# Supplementary material for: Cadmium telluride quantum dot-exposed human bronchial epithelial cells: a further study of the cellular response by proteomics
Source: Royal Society of Chemistry journal article supplement (doi:10.1039/c9tx00126c), 2019-10-22
Supplement: c9tx00126c1.xlsx [file c9tx00126c1.xlsx]

## Sheet: Sheet1
Table S1. Normalized protein spot volumes of BEAS-2B cells treated with 20 mg/mL CdTe QDs for 24 h
	Volume, 10-3% (mean±SD)			P-value
Protein	Control	520Q	580Q	control vs 520Q	control vs 580Q
MYL12A	123.3±6.6	466.07±10	419.3±1.8	9.92627e-07	1.89985e-07
EIF5A	34.2±1.56	309.5±23.78	360.13±1.45	3.68183e-05	1.21544e-09
PRDX6	59.9±1.5	150.5±3.7	233.6±8.1	2.50322e-06	3.35559e-06
HSPB1	81.8±4.9	256.9±7.2	158.7±1.0	4.05781e-06	1.1813e-05
RPLP0	40.2±0.8	160.7±7.2	164.82±11.5	8.63908e-06	4.78993e-05
PAFAH1B3	62.1±8.4	204.9±10.9	152.8±2.1	5.6326e-05	5.42638e-05
PA2G4	31.0±1.5	125.0±5.6	151.59±17.9	9.56473e-06	0.000312635
GSTP1	72.3±9.3	157.61±12.1	195.9±1.8	0.000636764	2.27019e-05
PPIA	80.2±16.2	163.4±11.9	199.9±2.5	0.355997	0.000227167
EEF1B2	94.6±9.1	210.6±0.98	171.2±11.3	2.54843e-05	0.000793678
TPT1	46.4±7.4	151.5±5.7	124.9±0.23	4.08736e-05	5.17201e-05
MYL12A	54.7±5.0	169.6±19.1	116.0±19.4	0.000544957	0.00608827
GSTP1	1.35±5.9	98.1±10.2	61.8±1.7	0.000141976	6.93609e-05
ANXA1	60.4±3.5	126.1±10.8	145.9±2.6	0.000556933	4.48232e-06
NME1	81.2±19.3	146.2±2.7	160.8±5.9	0.00445852	0.00240138
PARK7	110.6±5.2	154.1±3.9	199.1±18.2	0.000316489	0.00126379
PRDX1	112.7±7.9	205.6±2.4	151.02±15.3	4.0874e-05	0.0182317
PPA1	16.3±12.1	69.2±12.4	83.6±1.4	0.00613471	0.000666146
UCHL1	36±4.7	79.6±1.8	104.04±9.2	0.000114943	0.000336896
CAPG	14.3±6.4	62.1±2.8	65.21±17.2	0.000290202	0.00861776
BLVRB	70.5±4.6	112.2±18.4	124.0±13.5	0.0189702	0.00289458
PRDX2	28.97±2.1	76.5±17.4	76.2±4.5	0.00932776	7.95113e-05
HSPA6	8.7±8.4	56.55±11.2	52.2	0.00407835	0.000854893
EZR	21.0±21.6	66.2±19.3	66.36±2.4	0.0539407	0.0224554
ARHGDIA	68.2±1.2	114.6±11.4	105.1±9.1	0.00217925	0.00223598
NUDT5	33.2±1.6	73.04±19.1	66.73±18.4	0.0227538	0.0346997
PFN1	89.9±13.8	160.9±6.4	92.1±19.1	0.00127218	0.879373
GNB2L1	51.6±8.9	73.8±10.3	85.14±8.4	0.0475992	0.00899131
PPIA	78.5±5.1	90.4±19.1	120.2±2.6	0.00200425	0.000224983
PKM	35.6±1.8	36.3±29.3	48.06±3.6	0.969034	0.00583877
IMPDH2	68.2±18.9	35.9±2.6	48.1±4.6	0.0427094	0.147989
HNRNPAB	123.1±12.1	84.9±3.1	89.6±23.9	0.000119457	0.0011092
DNAJB11	71.1±1.5	31.9±7.9	27.3±22.8	0.00107765	0.0293735
LAP3	171.8±19.2	121.5±1.3	114.1±28.2	0.0105996	0.0428384
MTHFD2	105.7±2.3	44.8±1.5	56.9±18.3	2.74298e-06	0.0101623
PSMB3	119.8±11.9	57.9±4.6	66.2±19.7	0.00109741	0.0156847
HNRNPL	128.2±13.5	69.2±11.4	71.0±2.6	0.000618741	0.00412701
ETFB	179.2±9.4	113.0±2.6	125.3±4.1	0.000299473	0.000807577
TUFM	70.3±3.1	12.8±9.4	ND	0.000548724	2.50993e-06
HNRNPAB	106.4±1.3	41.1±7.5	35.0±14.7	0.00609933	0.0962403
HNRNPL	120.3±12.2	37.2±8.3	53.9±15.2	0.00444057	0.00196563
HSD17B10	131.5±11.8	45.1±2.5	67.5±12.4	0.000242628	0.00292994
PRDX3	111.6±19.1	23.67±7.3	45.2±10.6	0.00173562	0.0062336
HADH	140.6±2.9	58.6±0.9	51.9±22.7	1.24966e-06	0.00256284
PYCR1	129±1.8	36.4±5.2	49.9±21.4	8.24852e-06	0.00309736
PRDX4	150.2±11.3	49.6±4.9	78.1±12.5	0.00014493	0.00176874
MRPL12	244.5±9.1	109.8±4.7	164.1±0.73	2.98328e-07	2.98328e-07
ATP5H	165.4±13	52.9±6.03	59.2±12.9	0.000169369	0.000552578
PRDX3	231.7±8.4	105.3±1.6	123.7±8.2	1.38226e-05	9.06557e-05
ERP29	219.6±9.1	75.3±8.7	89.6±1.1	3.79832e-05	1.62974e-05
C1QBP	233.7±3.4	75.8±5.9	111.3±1.7	2.29647e-06	6.18855e-07
CBX1	189.7±12	40±5.0	28.0±1.4	3.72865e-05	2.05196e-05
GUK1	201.91±3.5	22.9±8.2	56.1±19.2	4.07976e-06	0.000205714
COX5A	382.7±5.1	179.3±10.4	101.2±4.9	6.96133e-06	2.6526e-07
MRPL12	297.6±7.7	ND	ND	2.20004e-05	0.000107716
HNRNPA1	629.2±5.7	331.5±2.1	190.67±9.3	1.15464e-07	2.54838e-07
PPIB	851.8±2.9	306.4±9.6	368.7±21.6	7.61482e-08	2.74872e-06
