# Supplementary material for: Cadmium telluride quantum dot-exposed human bronchial epithelial cells: a further study of the cellular response by proteomics
Source: Royal Society of Chemistry journal article supplement (doi:10.1039/c9tx00126c), 2019-10-22
Supplement: c9tx00126c2.pdf [file c9tx00126c2.pdf]

## Supplementary material

### **Cadmium telluride quantum dot-exposed human bronchial epithelial cells: a further study of the cellular response by proteomics**

**Yan-Ming Xu, Heng Wee Tan, Wei Zheng, Zhan-Ling Liang, Fei-Yuan Yu, Dan-Dan Wu, Yue Yao, Qiu-Hua Zhong, Rui Yan and Andy T. Y. Lau**

#### **Including:**

**Fig. S1** Analyses of cellular proteins from BEAS-2B cells dosed with CdTe QDs.

**Fig. S2** Confirmation of MS data by western blot analyses.

**Fig. S3** Measurement of ROS generation.

**Fig. S4** Induction of differentially-expressed proteins by CdTe QD is inhibited by antioxidant GSH.

**Fig. S5** Cell viability of BEAS-2B upon 24 h treatment of 730Q with/without antioxidant GSH pretreatment.

**A**

**520Q**

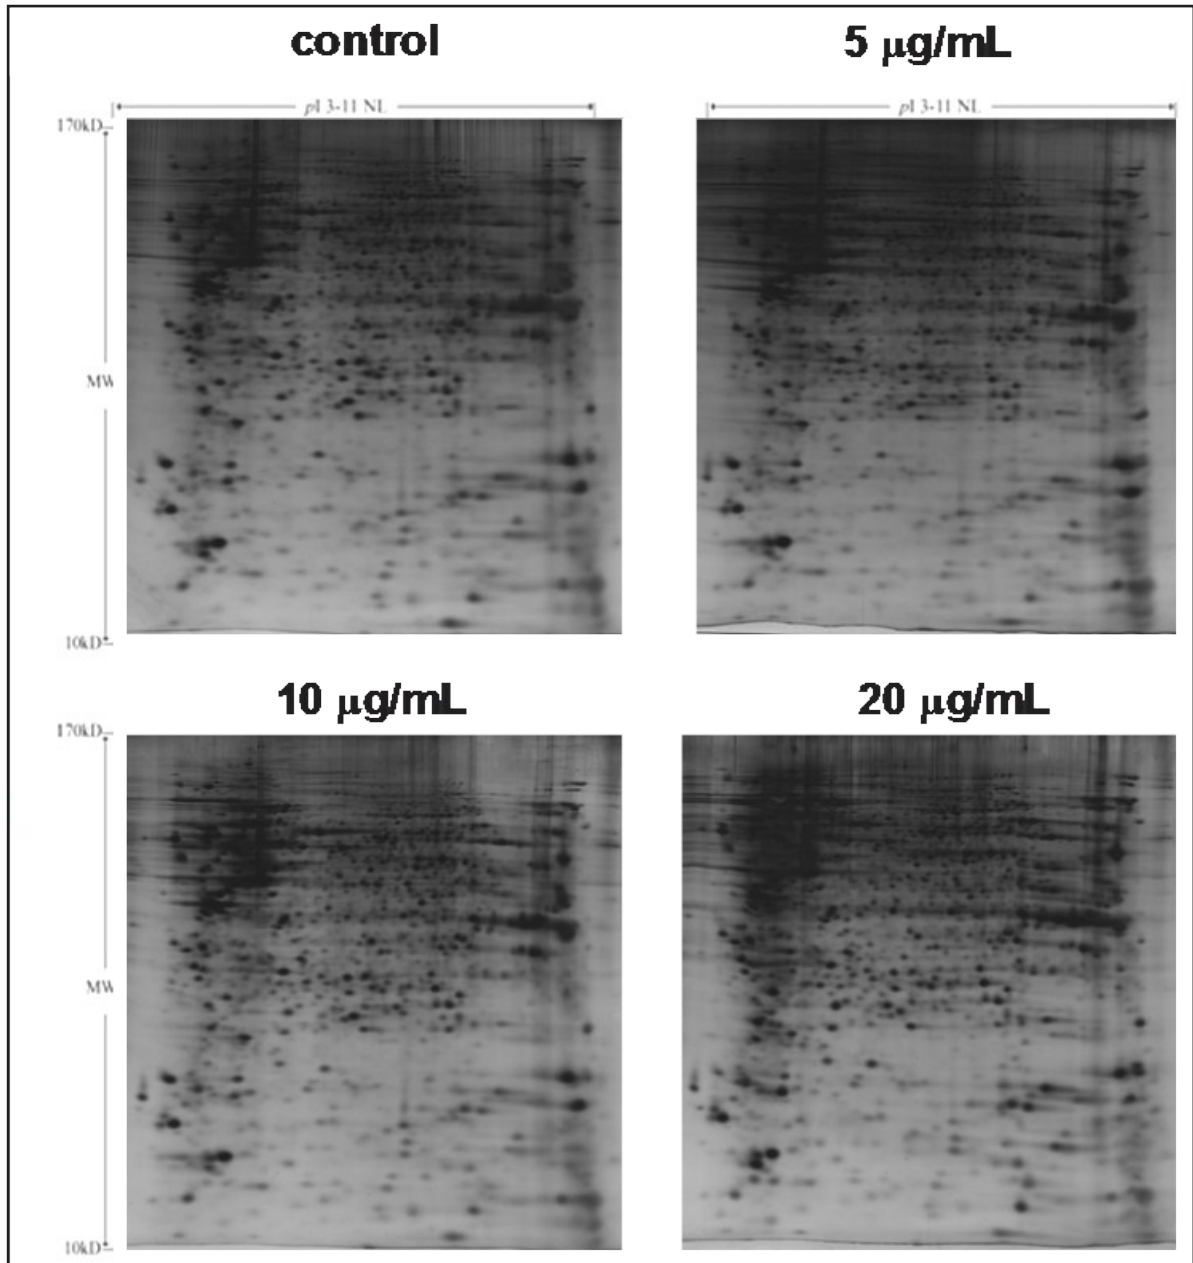

**B**

**580Q**

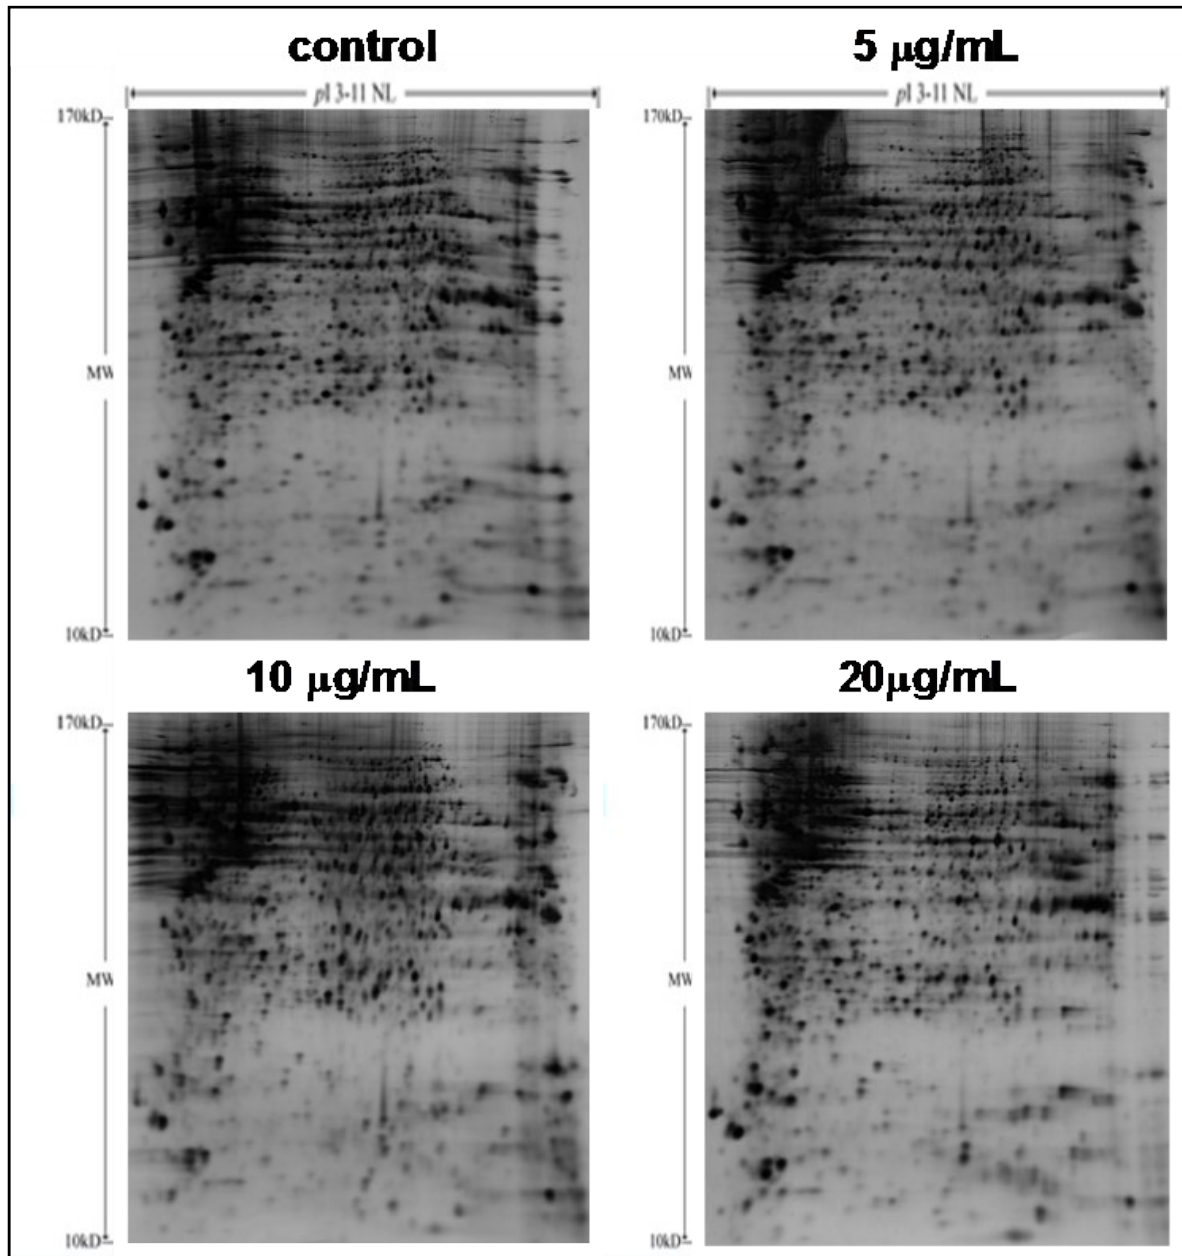

C

730Q

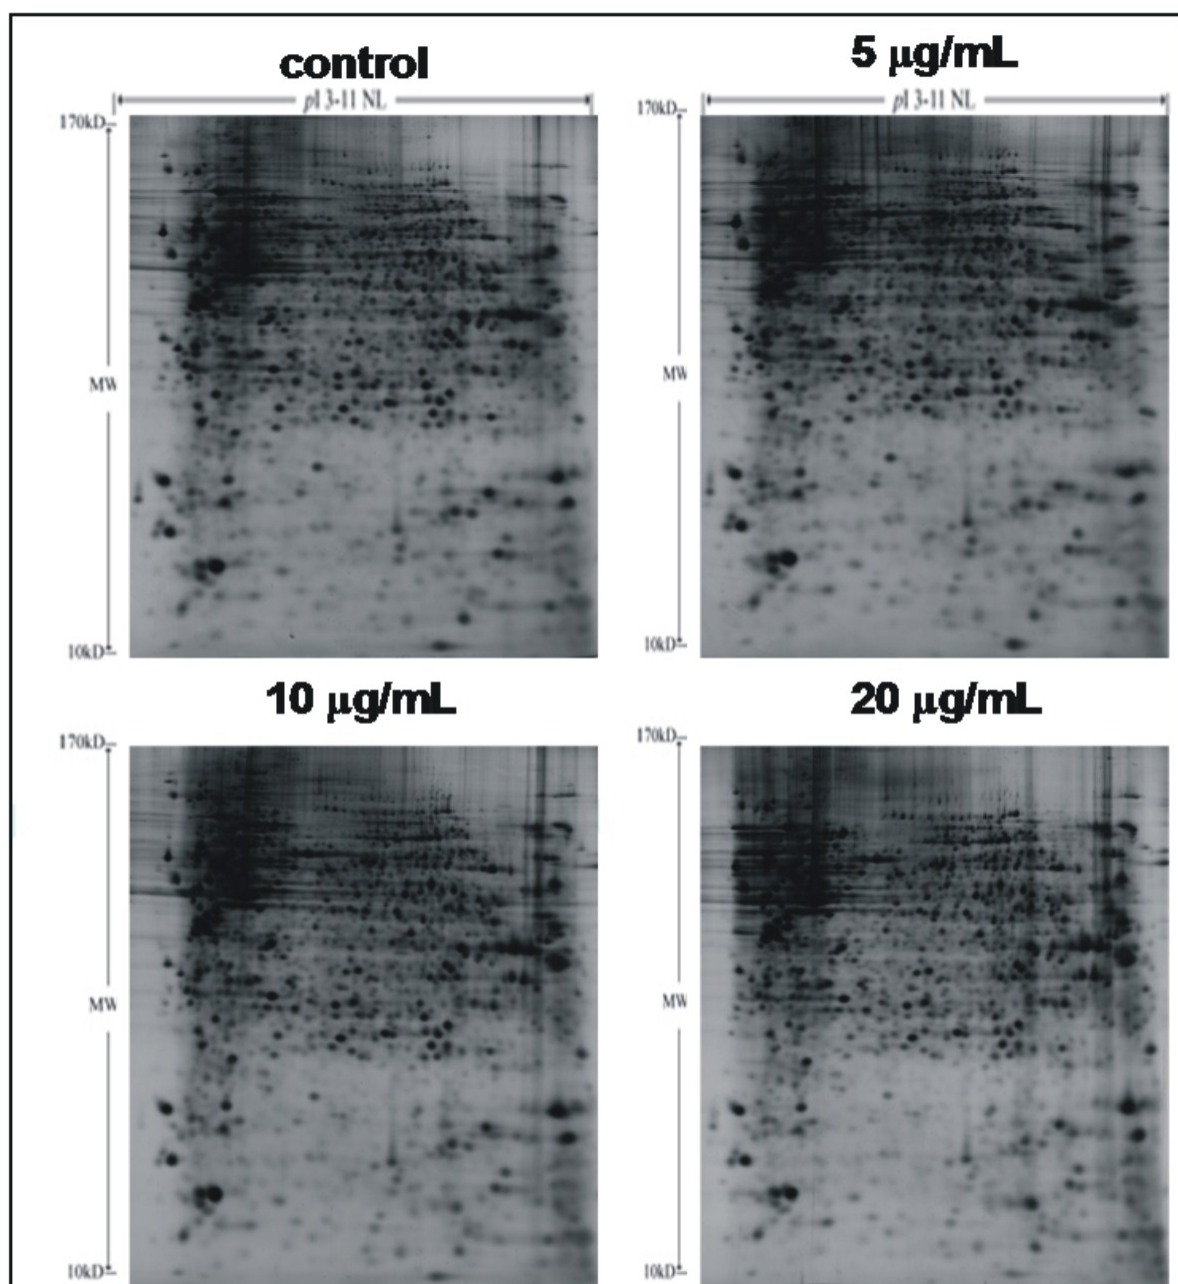

**Fig. S1** Analyses of cellular proteins from BEAS-2B cells dosed with CdTe QDs. Representative gel images of BEAS-2B cells treated with 5, 10, or 20 µg/ml (A) 520Q, (B) 580Q, or (C) 730Q for 24 h visualized by two-dimensional gel (12.5%) and silver staining. The results are representative of three independent experiments.

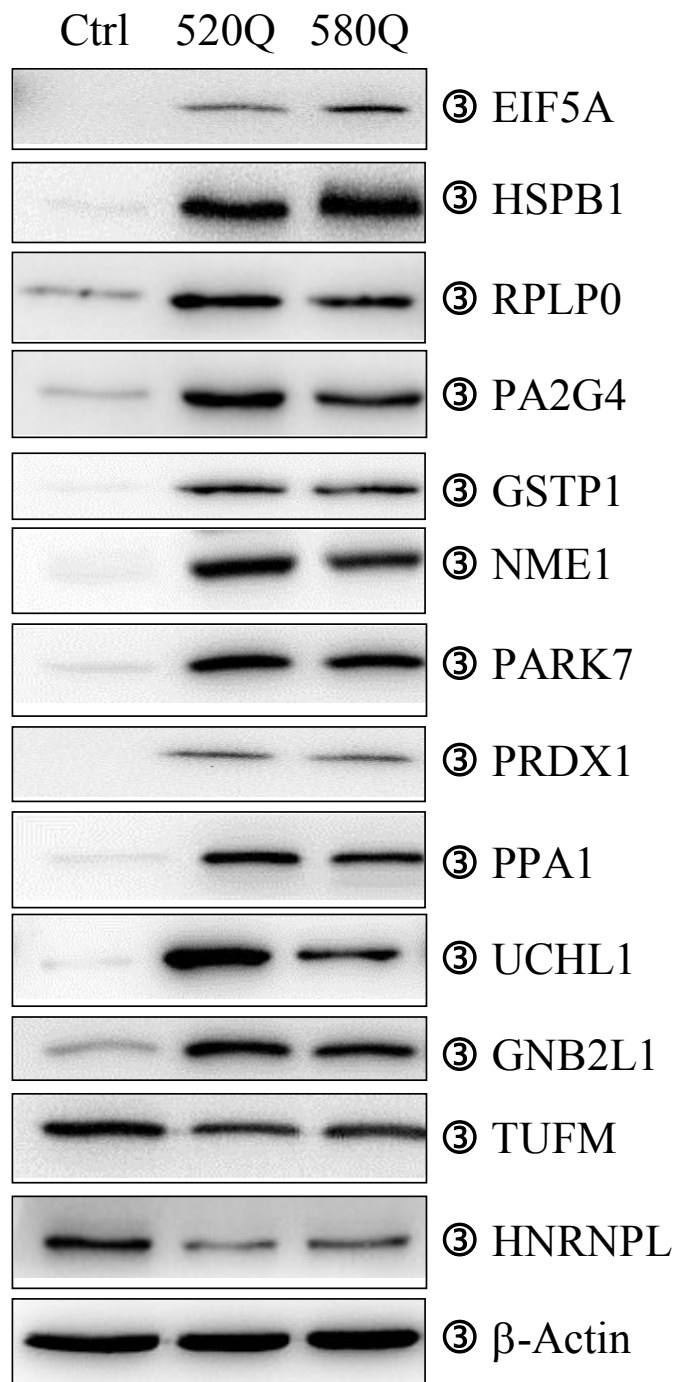

**Fig. S2** Confirmation of MS data by western blot analyses. BEAS-2B cells were sham-exposed or treated with 20  $\mu$ g/mL 520Q or 580Q for 24 h; cells were lysed; and protein extracts were subjected to western blot analysis using various antibodies. The same blot was stripped and reprobed with a monoclonal  $\beta$ -actin antibody to monitor the loading difference. Data are representative of three independent experiments.

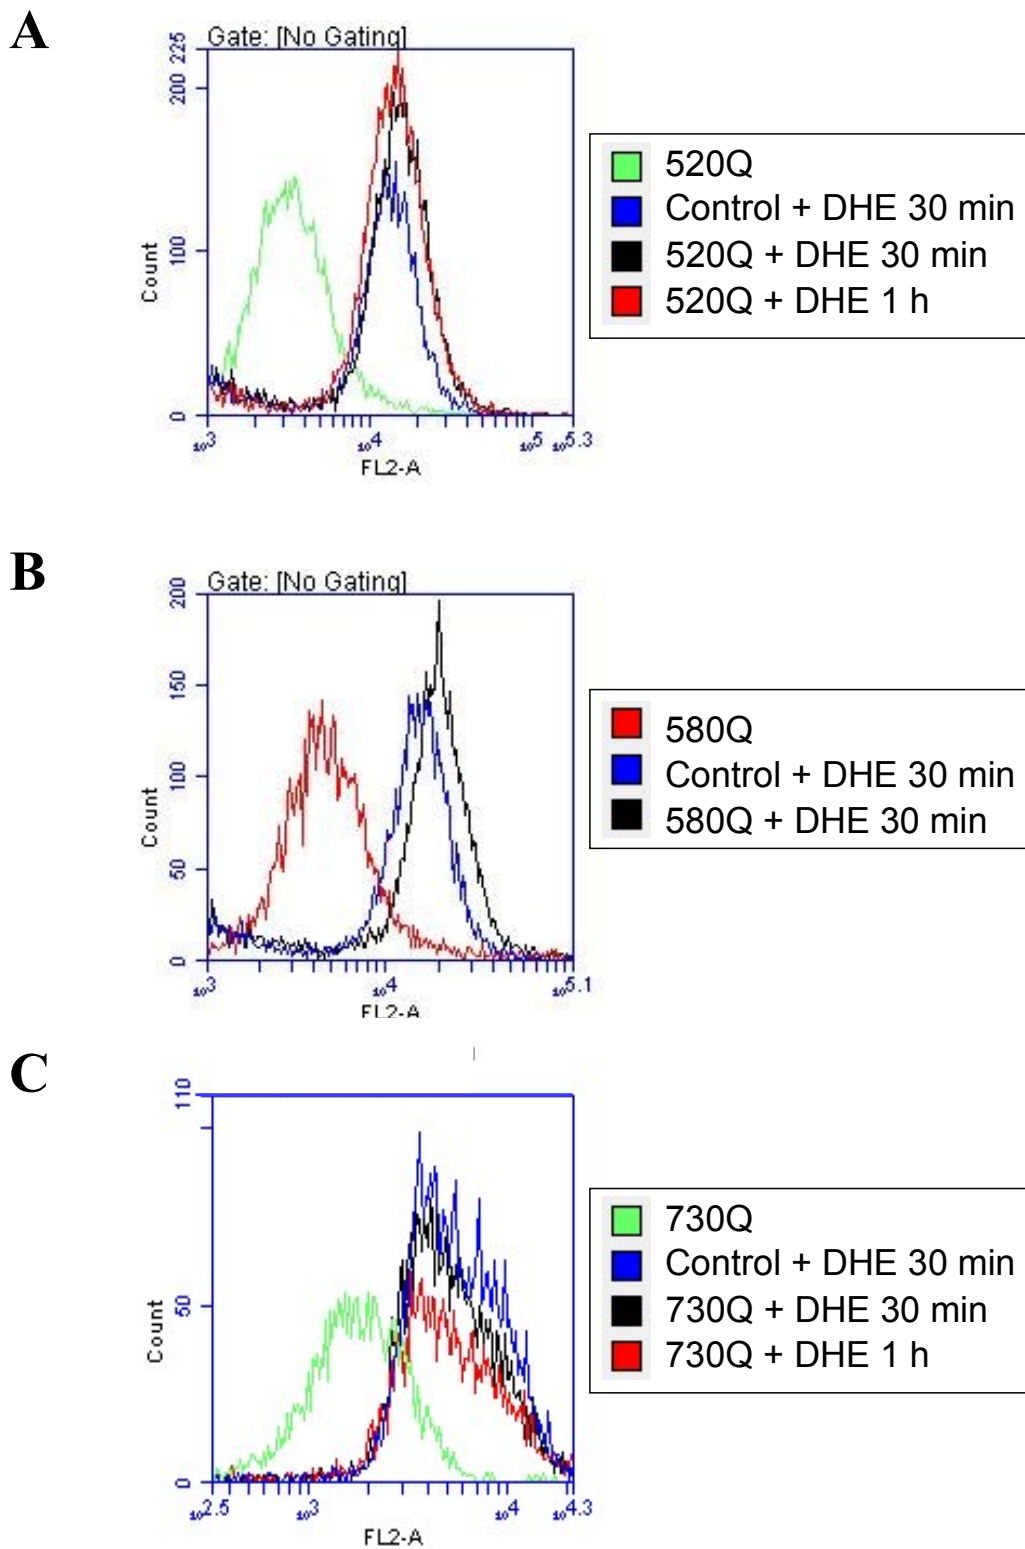

**Fig. S3** Measurement of ROS generation. ROS level of 10  $\mu\text{g/mL}$  CdTe QD-treated BEAS-2B cells (A) 520Q, (B) 580Q, or (C) 730Q determined by DHE staining. Data are representative of three independent experiments.

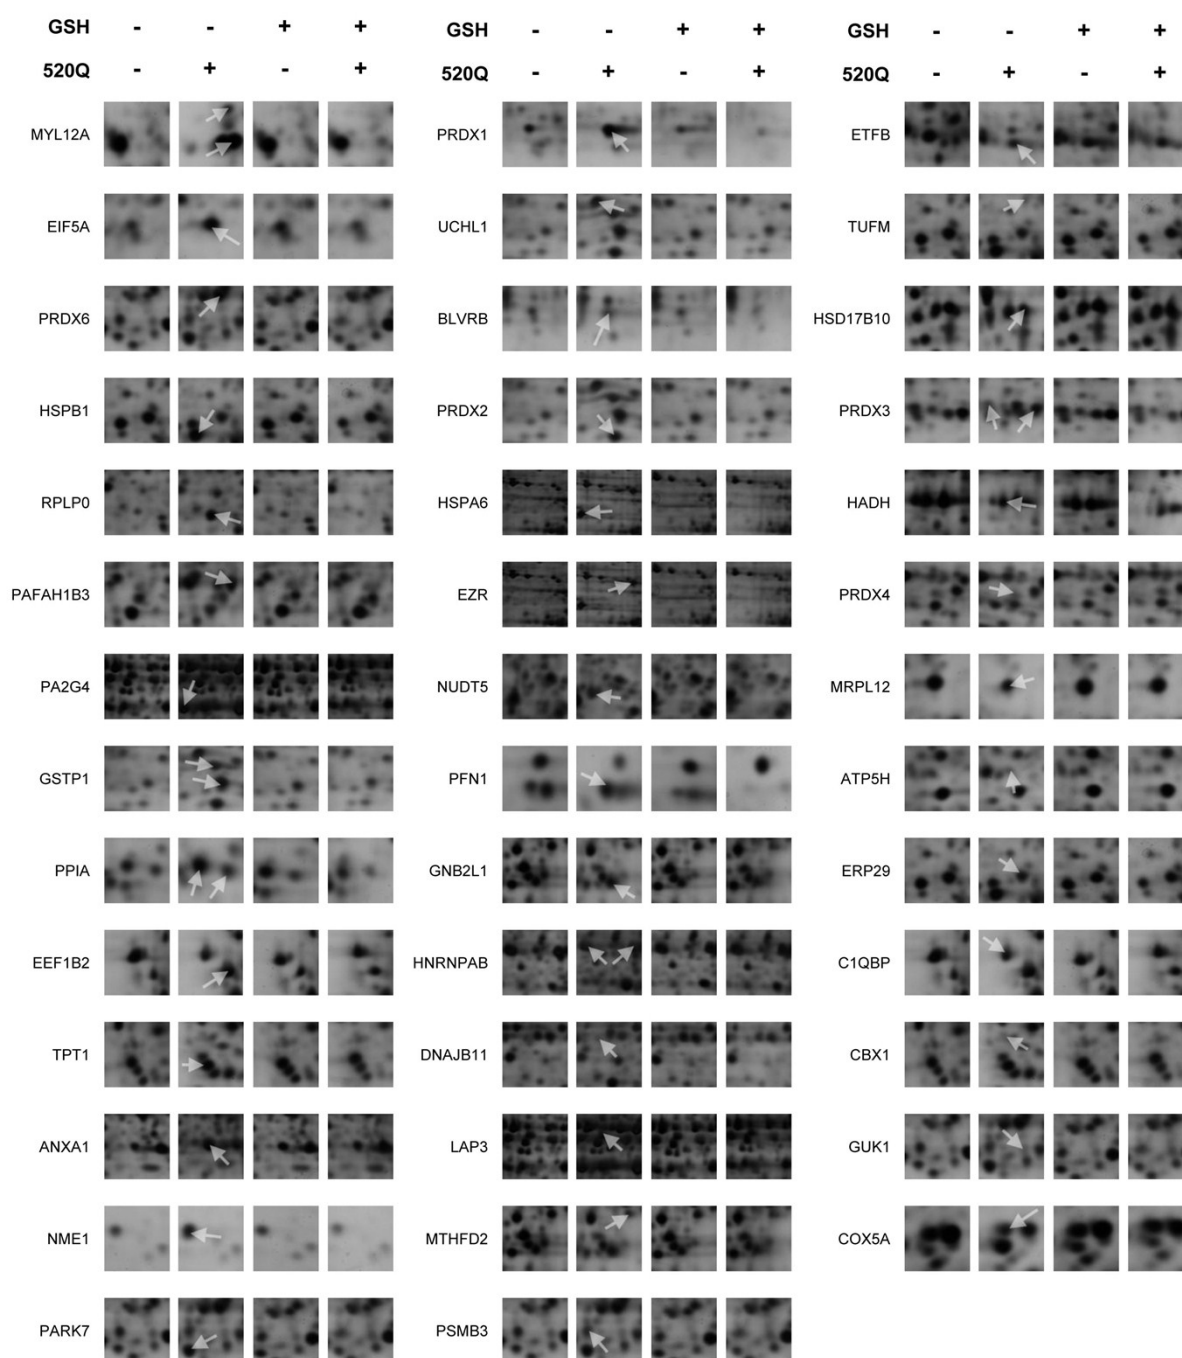

**Fig. S4** Induction of differentially-expressed proteins by CdTe QD is inhibited by antioxidant GSH. BEAS-2B cells were exposed to 520Q (20  $\mu\text{g}/\text{mL}$ ) in the absence or presence of 20 mM GSH (pH adjusted to 7.6). GSH was added 1 h before the addition of 520Q. BEAS-2B cells were also treated with GSH alone. After treatment for 24 h, cells were collected. The effects of GSH on the protein expression profiles in basal and 520Q-treated cells were assessed by 2DE analyses and shown in montage view. The results are representative of three independent experiments.

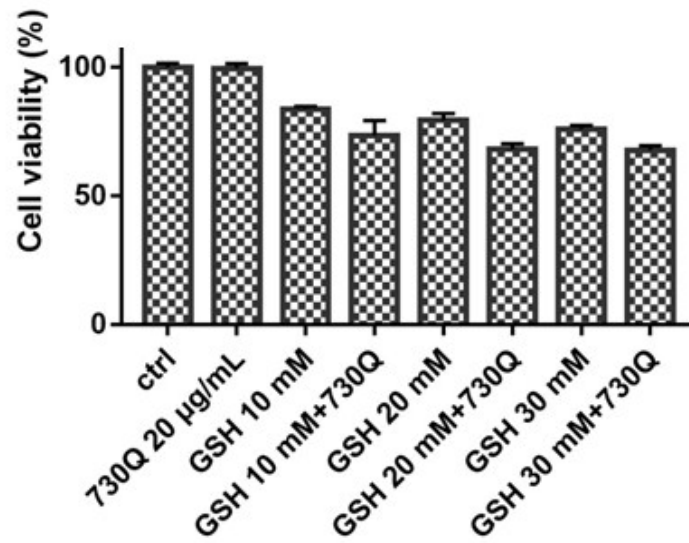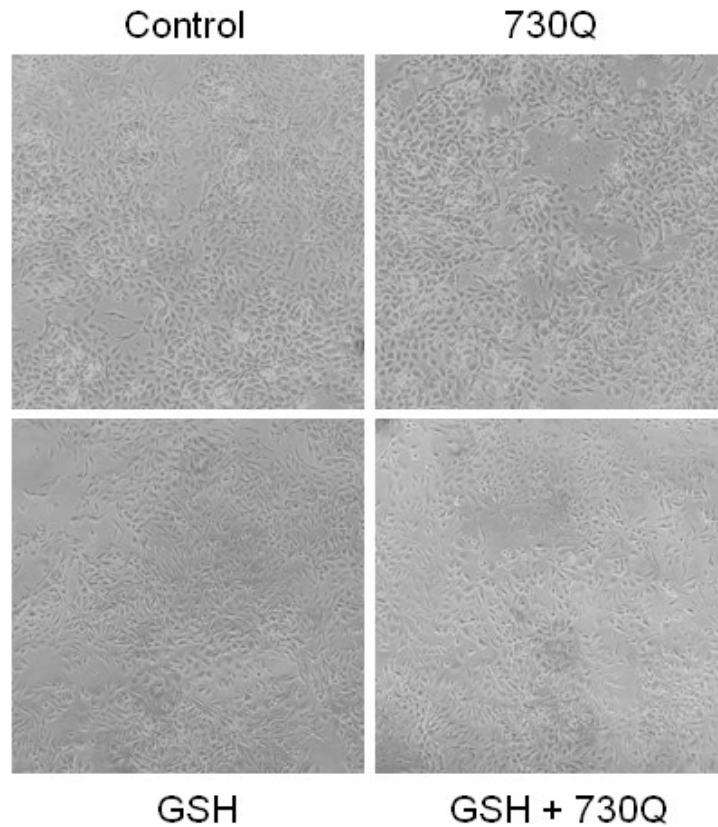

**Fig. S5** Cell viability of BEAS-2B upon 24 h treatment of 730Q with/without antioxidant GSH pretreatment. BEAS-2B cells were untreated or pretreated with GSH (10–30 mM) for 1 h and then exposed to 20 µg/mL 730Q for 24 h. Cell viability was measured by naphthol blue black (NBB) staining assay as shown on the top. The percentage of viability was expressed as 100% for sham-exposed cells. The corresponding BEAS-2B cell morphology was captured and shown below. The results are representative of three independent experiments.
